# Supplementary material for: The SQSTM1-NUP214 fusion protein interacts with Crm1, activates Hoxa and Meis1 genes, and drives leukemogenesis in mice
Source: PubMed Central journal article supplement (PMC7188244; doi:10.1371/journal.pone.0232036), 2020-04-28

Uncropped blot in Fig 1D

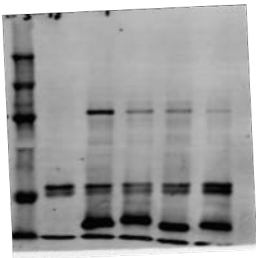

Uncropped blot in Fig 2A

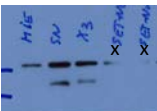

Uncropped blots in Fig 2F

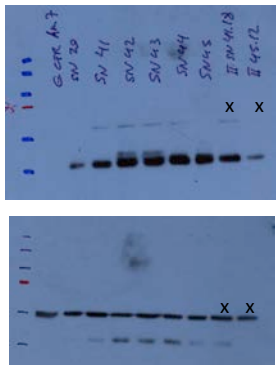

Supplement: pone.0232036.s003.pdf [file pone.0232036.s003.pdf]
